RESEARCH ARTICLE

# Effects of Two Types of Melatonin-Loaded Nanocapsules with Distinct Supramolecular Structures: Polymeric (NC) and Lipid-Core Nanocapsules (LNC) on Bovine Embryo Culture Model

Eliza Rossi Komninou<sup>1</sup>, Mariana Härter Remião<sup>1</sup>, Caroline Gomes Lucas<sup>1</sup>, William Borges Domingues<sup>1</sup>, Andrea Cristina Basso<sup>2</sup>, Denise Soledade Jornada<sup>3</sup>, João Carlos Deschamps<sup>1</sup>, Ruy Carlos Ruver Beck<sup>3</sup>, Adriana Raffin Pohlmann<sup>4</sup>, Vilceu Bordignon<sup>5</sup>, Fabiana Kömmling Seixas<sup>1</sup>, Vinicius Farias Campos<sup>1</sup>, Silvia Stanisçuaski Guterres<sup>3\*</sup>, Tiago Collares<sup>1\*</sup>

**1** Programa de Pós-Graduação em Biotecnologia (PPGB), Grupo de Pesquisa em Oncologia Celular e Molecular, Biotecnologia/Centro de Desenvolvimento Tecnológico, Universidade Federal de Pelotas, Pelotas, 96010–900, RS, Brazil, **2** *In Vitro* Brasil S/A, Mogi Mirim, 13800–970, SP, Brazil, **3** Faculdade de Farmácia, Universidade Federal do Rio Grande do Sul, Av. Ipiranga, 2752, Porto Alegre, 90610–000, RS, Brazil, **4** Departamento de Química Orgânica, Instituto de Química, Universidade Federal do Rio Grande do Sul, Porto Alegre, 91501–970, RS, Brazil, **5** Department of Animal Science, McGill University, Sainte Anne de Bellevue, H9X 3V9, QC, Canada

\* [silvia.guterres@ufrgs.br](mailto:silvia.guterres@ufrgs.br) (SSG); [tiago.collares@pq.cnpq.br](mailto:tiago.collares@pq.cnpq.br) (TC)

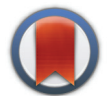

CrossMark  
click for updates

OPEN ACCESS

**Citation:** Komninou ER, Remião MH, Lucas CG, Domingues WB, Basso AC, Jornada DS, et al. (2016)

Effects of Two Types of Melatonin-Loaded Nanocapsules with Distinct Supramolecular Structures: Polymeric (NC) and Lipid-Core Nanocapsules (LNC) on Bovine Embryo Culture Model. PLoS ONE 11(6): e0157561. doi:10.1371/journal.pone.0157561

**Editor:** Wilfried A. Kues, Friedrich-Loeffler-Institute, GERMANY

**Received:** February 17, 2016

**Accepted:** June 1, 2016

**Published:** June 16, 2016

**Copyright:** © 2016 Komninou et al. This is an open access article distributed under the terms of the [Creative Commons Attribution License](https://creativecommons.org/licenses/by/4.0/), which permits unrestricted use, distribution, and reproduction in any medium, provided the original author and source are credited.

**Data Availability Statement:** All relevant data are within the paper and its Supporting Information files.

**Funding:** The authors received no specific funding for this work.

**Competing Interests:** The authors have declared that no competing interests exist.

## Abstract

Melatonin has been used as a supplement in culture medium to improve the efficiency of *in vitro* produced mammalian embryos. Through its ability to scavenge toxic oxygen derivatives and regulate cellular mRNA levels for antioxidant enzymes, this molecule has been shown to play a protective role against damage by free radicals, to which *in vitro* cultured embryos are exposed during early development. *In vivo* and *in vitro* studies have been performed showing that the use of nanocapsules as active substances carriers increases stability, bioavailability and biodistribution of drugs, such as melatonin, to the cells and tissues, improving their antioxidant properties. These properties can be modulated through the manipulation of formula composition, especially in relation to the supramolecular structures of the nanocapsule core and the surface area that greatly influences drug release mechanisms in biological environments. This study aimed to evaluate the effects of two types of melatonin-loaded nanocapsules with distinct supramolecular structures, polymeric (NC) and lipid-core (LNC) nanocapsules, on *in vitro* cultured bovine embryos. Embryonic development, apoptosis, reactive oxygen species (ROS) production, and mRNA levels of genes involved in cell apoptosis, ROS and cell pluripotency were evaluated after supplementation of culture medium with non-encapsulated melatonin (Mel), melatonin-loaded polymeric nanocapsules (Mel-NC) and melatonin-loaded lipid-core nanocapsules (Mel-LNC) at  $10^{-6}$ ,  $10^{-9}$ , and  $10^{-12}$  M drug concentrations. The highest hatching rate was observed in embryos

treated with  $10^{-9}$  M Mel-LNC. When compared to Mel and Mel-NC treatments at the same concentration ( $10^{-9}$  M), Mel-LNC increased embryo cell number, decreased cell apoptosis and ROS levels, down-regulated mRNA levels of *BAX*, *CASP3*, and *SHC1* genes, and up-regulated mRNA levels of *CAT* and *SOD2* genes. These findings indicate that nanoencapsulation with LNC increases the protective effects of melatonin against oxidative stress and cell apoptosis during *in vitro* embryo culture in bovine species.

## Introduction

*In vitro* culture conditions including the energy source, growth factors, pH, atmospheric oxygen concentration or transient light exposure, are associated with detrimental factors to the embryonic development, caused by enhanced levels of reactive oxygen species (ROS) [1]. These molecules are highly reactive and can oxidize DNA, proteins, and lipids resulting in mitochondrial alterations, ATP depletion, embryonic developmental arrest, low blastocyst production and defective embryo development [1, 2]. Additionally, ROS participate in cell signaling and modulation of cell death via caspase activation and regulation of anti-apoptotic and pro-apoptotic proteins of the Bcl-2 family [3].

Melatonin and its metabolites scavenge ROS and reduce the oxidative injury, promoting the development of oocytes and enhancing the quality of *in vitro* developed embryos in several species [4–14]. This molecule works through a myriad of signaling cascades that are protective to cells, acting dependently and independently of melatonin receptors (MT1 and MT2) to reduce free-radical formation [15]. The direct scavenger activity against toxic oxygen derivatives, and the ability to stimulate detoxifying enzymes like superoxide dismutase and glutathione peroxidase, have been described as the main melatonin mechanisms to intercept and prevent ROS production in embryos [16, 17].

Although melatonin easily crosses morphophysiological barriers, reaching cells and subcellular compartments in the organism [18], this molecule has an amphiphilic characteristic and is poorly soluble in aqueous solutions. These features can potentially limit its half-life, bioavailability and distribution into the cells depending on the biological environment [19]. *In vivo* and *in vitro* experiments have shown improved antioxidant and anti-apoptotic effects of melatonin against lipid peroxidation through its association with nanoparticulated systems (polymeric nanocapsules and solid lipid nanoparticles) in comparison to immediate release formulations [18–25].

Biocompatible engineered nanomaterials, especially nanoparticulated systems (NPs), has attracted the interest of many research groups due to its high loading capacity, stability and selective affinity that can represent a potential tool for delivering molecules into gametes and embryos [26, 27]. These systems that include solid lipid nanoparticles, polymeric nanocapsules and nanospheres [28], have been defined as colloidal particles having an average hydrodynamic diameter between 100 and 300 nm [29–31]. Within the NPs, nanoencapsulation has the advantage of entrapping the drug into the core, solubilizing of water insoluble drugs, and conferring drug protection against photochemical, chemical, or enzymatic degradation, improving the drug stability and efficacy [30, 32].

The materials that are used in surface and core of nanocapsules define its supramolecular structure. Distinct mechanical properties confer different advantages to the use of nanocapsules, like increasing of drug efficiency and reducing of toxicity and tissue irritation [30, 31, 33, 34]. Lipid-core nanocapsules (LNC), a new class of nanocapsules, have been shown to have some advantages over the polymeric nanocapsules (NC) [35]. Whereas the NC are composed

of a liquid oily core surrounded by a polymeric nanometric film [23], LNC is formed of an organogel of sorbitan monostearate and capric/caprylic triglyceride, surrounded by poly( $\epsilon$ -caprolactone), and stabilized with polysorbate 80 micelles [22, 23, 31, 33, 34]. This organogel-structured core influenced the polymer wall structure making the LNC stiffer than NC [35]. Furthermore, the sorbitan monostearate dispersed in the oily-core interacts with the drug increasing the loading capacity more than 40 times compared to conventional nanocapsules [36].

Considering that *i*) melatonin loaded-Eudragit<sup>®</sup> S100 nanocapsules (Mel-NC) can improve the antioxidant effects of melatonin, when compared to the non-encapsulated melatonin, that *ii*) LNC are promising intracellular carriers to melatonin, and that *iii*) no previous studies have been conducted to evaluate the effects of melatonin associated with nanoparticulated systems on cultured embryos, in this study, we examined the effects of melatonin associated with NC or LNC on *in vitro* development of bovine embryos.

## Materials and Methods

### Preparation of polymeric nanocapsules and lipid-core nanocapsules

Melatonin-loaded Eudragit<sup>®</sup> S100 [poly(methacrylic acid-co-methyl methacrylate)] nanocapsules (Mel-NC; Röhm GmbH, Sontheim an der Brenz, Baden-Württemberg, Germany) [22] and melatonin-loaded lipid-core nanocapsules (Mel-LNC) were prepared by interfacial deposition of polymer [34, 37–39].

Mel-NC were prepared as previously reported using the self-assembly method [20]. Briefly, the acetone solution (63 mL) containing 12.5 mg melatonin (Sigma-Aldrich Co., St. Louis, Missouri, USA), 0.8 mL capric/caprylic triglyceride (Delaware, Porto Alegre, Rio Grande do Sul, Brazil), 250 mg Eudragit<sup>®</sup> S100, and 192.5 mg sorbitan monooleate (Span 60; Sigma-Aldrich Co.) was added to an aqueous solution (125 mL) containing 192.5 g polysorbate 80 (Tween 80<sup>®</sup>; Delaware). The solvent was evaporated to eliminate the acetone and concentrate the turbid liquid solution to a final volume of 25 mL (0.5 mg/mL melatonin).

Mel-LNC were prepared by using the self-assembly general method described for LNC [34, 38, 40]. Briefly, 250 mg poly( $\epsilon$ -caprolactone) (PCL; Mn = 80 kg L<sup>-1</sup>; Sigma-Aldrich Co.), 95 mg sorbitan monostearate (Sigma-Aldrich Co.), 0.404 mL capric/caprylic triglyceride and 12.5 mg melatonin were dissolved in 63 mL acetone at 40°C. This organic phase was injected into an aqueous phase containing 192.5 mg polysorbate 80 micelles dispersed in 125 mL water at 40°C. A turbid solution was obtained instantaneously and kept under magnetic stirring for 10 minutes. Acetone was then eliminated by evaporation, and the liquid turbid solution was concentrated under reduced pressure at 40°C. The final volume was adjusted to 25 mL in a volumetric flask (0.5 mg/mL melatonin).

Drug-unloaded polymeric nanocapsules (NC) and lipid-core nanocapsules (LNC) formulations were prepared as described above but without the addition of melatonin. Due to its low aqueous solubility, non-encapsulated melatonin (Mel; 0.5 mg/mL) was prepared in sterile water containing 0.5% dimethyl sulphoxide (DMSO; Sigma-Aldrich Co.). In contrast, it was not necessary to solubilize the NC, LNC, Mel-NC and Mel-LNC formulations in DMSO.

### Particle size distribution and specific surface

The volume weighted average diameter ( $D_{4,3}$ ), the polydispersity (expressed as SPAN) and the specific surface area of the nanocapsules were determined by laser diffraction [41] using a Mastersizer<sup>®</sup> 2000 instrument (Malvern Instruments, Malvern, Worcestershire, England). Each nanocapsule suspension was directly poured into the wet dispersion unit containing about 100 mL of distilled water, in quantity enough to reach an obscuration between 0.02 and 0.10. The

size distribution profiles were obtained discounting the background signal of distilled water (dispersion medium). The  $D_{4,3}$  calculated by the Mie theory corresponds to the geometric diameters for spherical particles, and *SPAN* was calculated using the follow equation:

$$SPAN = \frac{d_{90} - d_{10}}{d_{50}}$$

where  $d_{10}$ ,  $d_{50}$  and  $d_{90}$  are the diameters under the size distribution curve at percentiles 10, 50 and 90. The diameter at percentile 50 by number (median) of particles ( $d_{50,n}$ ) was also calculated.

## Drug content

Drug content ( $C_{total}$ ) was assayed by HPLC (high-performance liquid chromatography) using a Perkin Elmer Series 200 chromatograph and Lichrospher RP-18 column (5  $\mu$ m; 250  $\times$  4 mm; Merck, Darmstadt, Hessen, Germany). The mobile phase was composed of acetonitrile/water (55:45, v/v). Melatonin was detected at 229 nm. This method was previously validated [22] considering linearity ( $R^2 = 0.9998$  for 2.5 to 17.5 mg/mL), intermediate precision (relative standard deviation = 3.1%), repeatability (relative standard deviation = 1.4 to 1.8%) and accuracy (101 $\pm$ 1%). Drug content ( $C_{total}$ ) was determined after the dissolution of Mel-NC and Mel-LNC in acetonitrile, dilution in the mobile phase, filtration (0.45  $\mu$ m, PVDF, Millipore Millex—HV) and injection in the chromatograph.

## Oocyte recovery and *in vitro* maturation (IVM)

Ovaries of Aberdeen and Red Angus (*Bos taurus*) heifers, ranging from 18 to 36 months of age, were collected from a local slaughterhouse (Pelotas, Rio Grande do Sul, Brazil). Cumulus-oocytes complexes (COCs) were aspirated from 2–8 mm follicles using a sterile 18-gauge needle attached to a disposable syringe. Only oocytes with homogeneous cytoplasm and a minimum of two layers of compact cumulus cells were selected. Groups of 15–20 COCs were matured in 90  $\mu$ L of IVM medium, under mineral oil at 38.5°C and 5% CO<sub>2</sub> for 22–24 hours. The IVM medium was composed of TCM-199 (Gibco<sup>®</sup>, Thermo Fisher Scientific inc., Waltham, Massachusetts, USA) supplemented with 10% FCS (Gibco<sup>®</sup>, Thermo Fisher Scientific inc.), 1  $\mu$ g/mL FSH (*Folltropin-V*<sup>®</sup>; *Bioniche Animal Health*, Belleville, Ontario, Canada), 50 UI/mL hCG (Profasi, Serono, Sao Paulo, Brazil), 1  $\mu$ g/mL estradiol (17 $\beta$ -estradiol; Sigma-Aldrich Co.), 0.2 mM sodium pyruvate (Sigma-Aldrich Co.), and 83.4  $\mu$ g/mL amikacin (Sigma-Aldrich Co.).

## *In vitro* fertilization (IVF)

After IVM, the COCs were transferred in groups of 20–25 to 90  $\mu$ L drops of IVF medium composed of TALP-IVF medium, with 0.2 mM sodium pyruvate, 83.4 g/mL amikacin, and 0.6% bovine serum albumin (BSA; Sigma-Aldrich Co.), supplemented with 20  $\mu$ g/mL heparin and 80  $\mu$ g/mL, penicillamine, hypotaurine, and epinephrine (PHE) solution. Cryopreserved semen straws from an Aberdeen Angus bull were thawed for 30 s in a water bath at 35°C. Sperm was washed by two centrifugation steps at 200  $\times$  g for 5 minutes: in the first step it was washed in 2 mL of TALP medium, with 0.2 mM sodium pyruvate, 83.4 g/mL amikacin, that was supplemented with 10 mM HEPES (Sigma-Aldrich Co.), and in the second washing in 2 mL of TALP-IVF medium. After visual assessment of motility, spermatozoa concentration was adjusted to 25  $\times$  10<sup>6</sup> live sperm/mL, and each fertilization drop received 4  $\mu$ L of sperm (final concentration of 1  $\times$  10<sup>5</sup> sperm per drop).

### *In vitro* culture (IVC)

Eighteen hours after IVF, the presumptive zygotes were stripped of cumulus cells using a pipette and then washed in a modified synthetic oviduct fluid culture medium (SOFaa BSA, *In Vitro* Brasil S/A, Mogi Mirim, Brazil). Selected zygotes with intact ooplasmic membrane were randomly allocated to experimental groups and cultured for 7 days in 100  $\mu$ L droplets of SOFaa BSA at 38.5°C and 5% CO<sub>2</sub> in air (approximately 20% of O<sub>2</sub>). At 72 and 120 hours of culture, two feedings were performed by replacing 50% of the culture medium of each drop with fresh medium maintaining the same initial concentration for each treatment. The medium used in the second feeding was supplemented with 1  $\mu$ g/mL D-(+)-Glucose (Sigma-Aldrich Co, Missouri, USA).

### Serial dilution of the formulations and supplementation in the culture medium

The initial drug concentration in the stock formulations of Mel-NC, Mel and Mel-LNC, was  $\sim 2 \times 10^{-3}$  M. The concentration of the stock formulations was then adjusted to  $1 \times 10^{-3}$  M by 1:1 dilution in milli-Q filtered water. Stock solutions (100 x) of working concentrations ( $1 \times 10^{-6}$  M,  $1 \times 10^{-9}$  M, and  $1 \times 10^{-12}$  M) were prepared by serial dilutions in milli-Q filtered water. Working solutions were prepared by diluting 1  $\mu$ L of the stock solution in 99  $\mu$ L of SOFaa BSA. For unloaded NC and LNC controls groups, equivalent volumes used to dilute the highest concentration of the nanocapsule groups containing melatonin ( $1 \times 10^{-6}$  M) were used. The concentration of nanocapsules in the stock formulations was estimated using a flow-cytometer (Guava<sup>®</sup> Flow Cytometry easyCyte™ System, Merck KGaA, Darmstadt, Germany). Values for Mel-NC, NC, Mel-LNC and LNC in the stock formulations were 2843, 2979, 2916 and 1754 nanocapsules/ $\mu$ L, respectively.

### Embryo evaluation

The proportion of oocytes that developed to 2- (cleaved), 4-, 8-, 16-cell, morulae and blastocyst stages were determined in nine replicates. At the end of the experiment, a total of 1839 presumptive zygotes allocated in twelve experimental groups ( $\sim 150$  per group) were assessed from day 1 to day 7 of culture by visual observation in a stereoscope. In five of these replicates, embryos that developed to the blastocyst stage were kept in culture until day 9 to evaluate hatching rates. Blastocysts produced in the other four replicates were fixed at day 7 to determine the total number of cells and the rate of cell apoptosis by terminal deoxynucleotidyl transferase dUTP nick end labeling (TUNEL) assay.

### Detection of cell apoptosis by TUNEL assay

DNA fragmentation was analyzed using a simultaneous nuclear staining and TUNEL assay protocol, following the manufacturer's instructions with minor modifications. For TUNEL preparation, expanded blastocysts at day 7 of culture were fixed for 1 hour at room temperature in 4% paraformaldehyde. Fixed embryos were washed in 70  $\mu$ L PBS-PVP solution, permeabilized with 0.5% Triton X-100 in PBS for 30 minutes at room temperature in a humidified box, and then washed again in 3 drops of PBS-PVP solution. Positive control embryos, from control group, were treated with 50  $\mu$ L of DNase I solution [3 U/mL DNase I (Invitrogen™, Thermo Fisher Scientific inc., Waltham, Massachusetts, USA) in 50 mM Tris-HCl, pH 7.5] for 20 minutes at 37°C, and then washed in PBS-PVP before proceeding with TUNEL labeling. Embryos were then incubated in fluorescein-conjugated dUTP and TdT (In Situ Cell Death Detection Kit, Fluorescein; Roche Diagnostics, Mannheim, Baden-Württemberg, Germany) for 1 hour at

38.5°C and 5% CO<sub>2</sub>. Negative control embryos, from control group, were incubated in the labeling mix without TdT. After the reaction was stopped, embryos were washed in PBS-PVP and transferred into 10 mg/mL Hoechst 33342 (Sigma-Aldrich Co.) in PBS for 30 minutes at room temperature in the dark. Embryos were then washed three times in PBS-PVP and mounted on slides and cover slips. Fluorescence emissions were recorded using a digital camera DP72 (Olympus Corporation, Shinjuku-ku, Tokyo, Japan) attached to an inverted fluorescent microscope IX 71 (Olympus Co.). The recorded fluorescent images were analyzed using the Cell<sup>^</sup>F software (Olympus SIS-Soft Imaging Solutions, Münster, North Rhine-Westphalia, Germany). Total number of nuclei and nuclei with fragmented DNA were evaluated in each embryo. Apoptotic cell rate (DNA-fragmented nucleus index) was calculated by dividing the number of cells with fragmented DNA by the total cell number [42]. The experiment was performed in four replicates with 3–4 embryos per group from each replicate.

### Measurement of Reactive Oxygen Species (ROS) levels

ROS levels in embryos were measured by 2',7'-dichlorodihydrofluorescein diacetate (DCHFDA; Sigma-Aldrich Co.) according to the modified protocol previously described [2, 43, 44]. The measurement was performed at day 3 post-fertilization in non-fragmented embryos at 4–8 cell-stage. The DCHFDA was freshly prepared in DMSO at  $1 \times 10^{-3}$  M before each experiment, kept in the dark, and used up to 48 hours after preparation. Embryos were incubated in IVC medium containing 1  $\mu$ M DCHFDA for 20 minutes at 38.5°C and then washed in IVC medium before being placed on a plate. For positive control, oocytes from control group were previously incubated for 1 hour in 50  $\mu$ M H<sub>2</sub>O<sub>2</sub>. Fluorescence emissions were recorded using a digital camera DP72 attached to an inverted fluorescent microscope IX 71 (Olympus Co.) after excitation at 480 nm and emission at 510 nm. The recorded fluorescent images were analyzed using the Cell<sup>^</sup>F software (Olympus SIS-Soft Imaging Solutions, Münster, North Rhine-Westphalia, Germany). Eight points per embryo were marked in each fluorescent image, and the average pixel intensity per embryo was used to compare ROS production among different groups. The experiment was performed in triplicate with 6–8 embryos per group in each replicate.

### RNA extraction, cDNA synthesis, and Real-Time PCR

Three pools of 8 blastocysts were prepared from each group after evaluating the hatching rate at day 9 of culture. Embryos were washed twice in PBS-PVP solution (1  $\mu$ g/mL polyvinylpyrrolidone in PBS), snap frozen and stored at -80°C for subsequent RNA extraction. Poly (A) RNA was isolated using the Dynabeads<sup>®</sup> mRNA DIRECT<sup>™</sup> Micro Kit (Thermo Fisher Scientific inc., Waltham, Massachusetts, USA) following the manufacturer's instructions with minor modifications, as previously described [45, 46]. Reverse transcription was conducted using the High Capacity cDNA Reverse Transcription Kit (Thermo Fisher Scientific inc.), according to manufacturer's instructions, and relative levels of each transcript were calculated by normalization to the abundance of  $\beta$ -actin as the internal control. Reactions were run on a Stratagene<sup>®</sup> Mx3005P<sup>™</sup> Real-Time PCR System [Agilent Technologies, Santa Clara, California, USA, using SYBR<sup>®</sup> Green PCR Master Mix (SYBR<sup>®</sup> Green PCR Master Mix, Thermo Fisher Scientific inc.)]. PCR was performed by adding 2  $\mu$ L of samples to the PCR mix containing specific primers for each gene. Primer sequences and annealing temperatures for all transcripts are shown in S1 Table. Amplification was carried out at cycling conditions of 95°C for 2 minutes, followed by 40 cycles of at 95°C for 15 seconds, 55–60°C for 60 seconds. Changes in the relative gene expression of the target were determined using the formula:  $2^{-[\Delta\Delta Ct]}$  [47]. PCR runs for each cDNA sample were performed in duplicate.

## Experimental design

The first experiment was designed to evaluate the effect of different concentrations of melatonin alone or loaded in nanocapsules (NC) or lipid-core nanocapsules (LNC). Melatonin concentrations tested in this experiment ( $10^{-6}$ ,  $10^{-9}$ , and  $10^{-12}$  M) were based on previous studies which evaluated the effects of non-encapsulated melatonin on *in vitro* maturation of oocytes, *in vitro* fertilization and *in vitro* embryo development in porcine [2, 12, 47], bovine [4, 6], and mice [13, 48].

Based on the results of embryo development and hatching obtained in the first experiment, the  $10^{-9}$  M concentration of melatonin was chosen to be used in the subsequent experiments to investigate the effect of the nanocapsule type (NC vs. LNC) on embryo cell number, cell apoptosis, ROS production in 4–8 cells stage embryos and relative mRNA abundance of genes in blastocysts. For these experiments, embryos were cultured in control media without melatonin, in the presence of  $10^{-9}$  M melatonin alone (Mel) or loaded in nanocapsules (Mel-NC or Mel-LNC).

## Statistical analyses

Chi-square analysis was performed to compare cleavage, blastocyst formation, and hatching rates. Total cell number, apoptosis, ROS levels, and mRNA levels of genes in embryos were compared among experimental groups using one-way analysis of variance (ANOVA) followed by Tukey's test for multiple comparisons. Transcript levels of the PRDX5 gene were compared by Kruskal-Wallis one-way ANOVA test when variances were unequal. The results were reported as the mean values for each set of data  $\pm$  SEM and the degree of statistical significance in all analyses was defined at a probability level of  $P < 0.05$ .

## Results

### Nanocapsules evaluation

Formulations were produced as homogeneous white milky liquids. The volume weighted average diameters ( $D_{4,3}$ ) of the nanocapsules were 237 nm and 288 nm (Mel-NC and NC, respectively) while the values for the lipid-core nanocapsules were 171 nm and 205 nm (Mel-LNC and LNC, respectively). The polydispersity of their size distribution profiles was respectively 2.18, 2.54, 1.7 and 1.9, whereas the specific surface areas were 45, 41, 47 and 41  $\text{m}^2 \text{g}^{-1}$ , and the  $d_{50,n}$  were 64, 65, 64 and 65 nm, respectively. Melatonin content was 0.49 mg/mL in Mel-NC and 0.41 mg/mL in Mel-LNC.

### Effects of free and nanoencapsulated melatonin on embryo development

There was no difference between treatments on cleavage rates or in the proportion of oocytes that developed to 4-, 8-, 16-cell, morulae and blastocyst stages ( $P > 0.05$ , S2 Table). However, the rates of hatched blastocysts in the Mel, Mel-NC, and Mel-LNC-treated groups were higher ( $P < 0.05$ , Fig 1 and S3 Table) than in the control groups (Control, NC and LNC). In addition, Mel-LNC at the  $10^{-9}$  M concentration produced the highest hatching rate (92%) in comparison with all other treatments ( $P < 0.05$ , Fig 1 and S3 Table).

### Effects of free and nanoencapsulated melatonin on cell apoptosis in blastocysts

The total cell number in blastocysts from the Mel-treated group was higher than in the control group ( $P < 0.05$ ), but not different ( $P > 0.05$ ) from the Mel-NC-treated group (Fig 2A and S4 Table). The highest number of cells was observed in embryos treated with Mel-LNC at  $10^{-9}$  M,

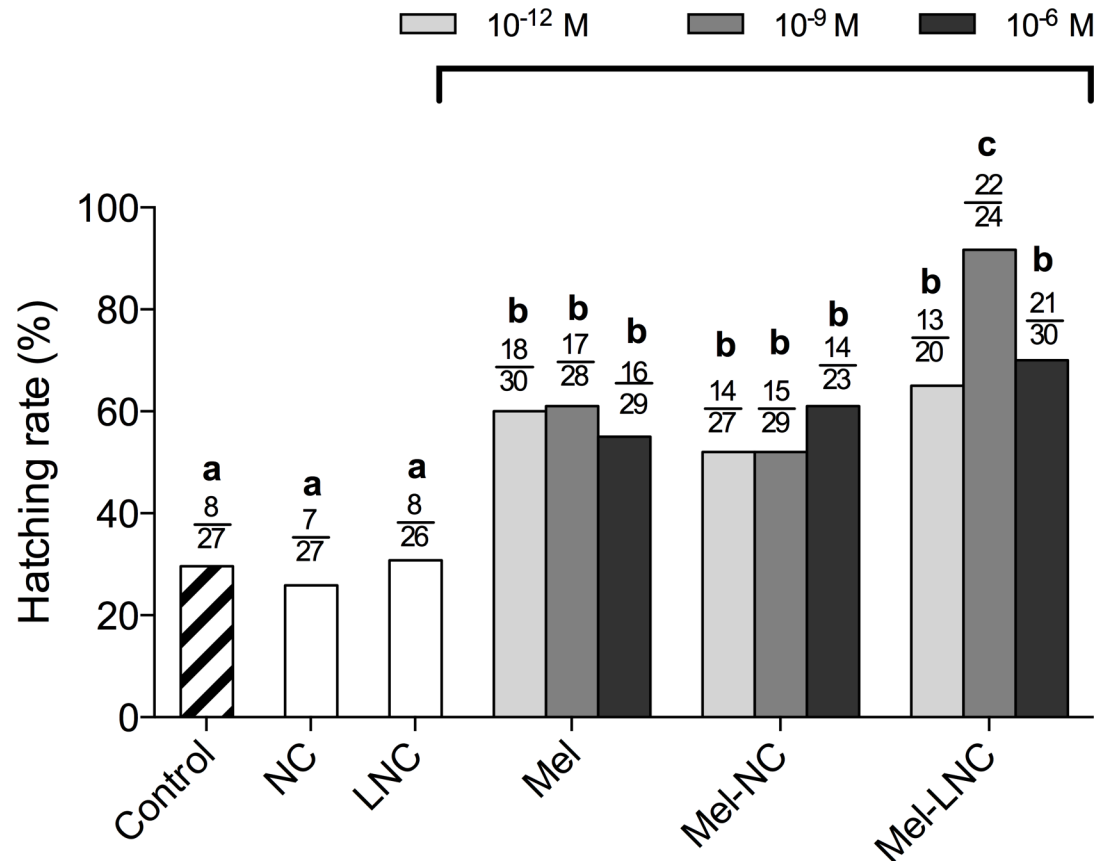

**Fig 1. Hatching rates of bovine embryos cultured in the presence of free or nanoencapsulated melatonin.** Mel = Non-encapsulated melatonin, Mel-NC = melatonin-loaded polymeric nanocapsules, Mel-LNC = melatonin-loaded lipid-core nanocapsules, NC = drug-unloaded nanocapsules, LNC = drug-unloaded lipid-core nanocapsules. Melatonin was used at 10<sup>-12</sup> M, 10<sup>-9</sup> M or 10<sup>-6</sup> M concentrations. Control group was cultured in SOFaa BSA alone. The numerators represent the numbers of hatched blastocysts and the denominators represent total blastocysts in each group. Different letters (a-c) above the bars indicate significant differences between groups ( $P < 0.05$ ).

doi:10.1371/journal.pone.0157561.g001

which was significantly superior ( $P < 0.05$ ) to all other groups (Fig 2A and S4 Table). The apoptosis rate was lower in the Mel-treated group than control group ( $P < 0.05$ ), but not different ( $P > 0.05$ ) from the Mel-NC-treated group (Fig 2B and S4 Table). Embryos treated with Mel-LNC had the lowest apoptotic cell rate ( $P < 0.05$ ) among all treatments (Fig 2B and S4 Table).

### Effects of free and nanoencapsulated melatonin on embryo ROS levels

The ROS levels in 4–8-cell embryos were lower ( $P < 0.05$ ) in the Mel-treated group than in the control group (Fig 3A and 3B), but not different ( $P > 0.05$ ) from the Mel-NC-treated group (Fig 3A and 3D). The ROS levels in Mel-NC-treated embryos were lower ( $P < 0.05$ ) than control group (Fig 3A and 3C). Embryos treated with Mel-LNC had the lowest ROS levels ( $P < 0.05$ ) among all treatments (Fig 3A and 3E).

### Effects of free and nanoencapsulated melatonin on the relative mRNA abundance of genes in blastocysts

Transcript levels of the pro-apoptotic *BCL2*-associated X protein (*BAX*) gene were lower in blastocysts treated with Mel and Mel-NC compared to control embryos ( $P < 0.05$ ). Blastocysts



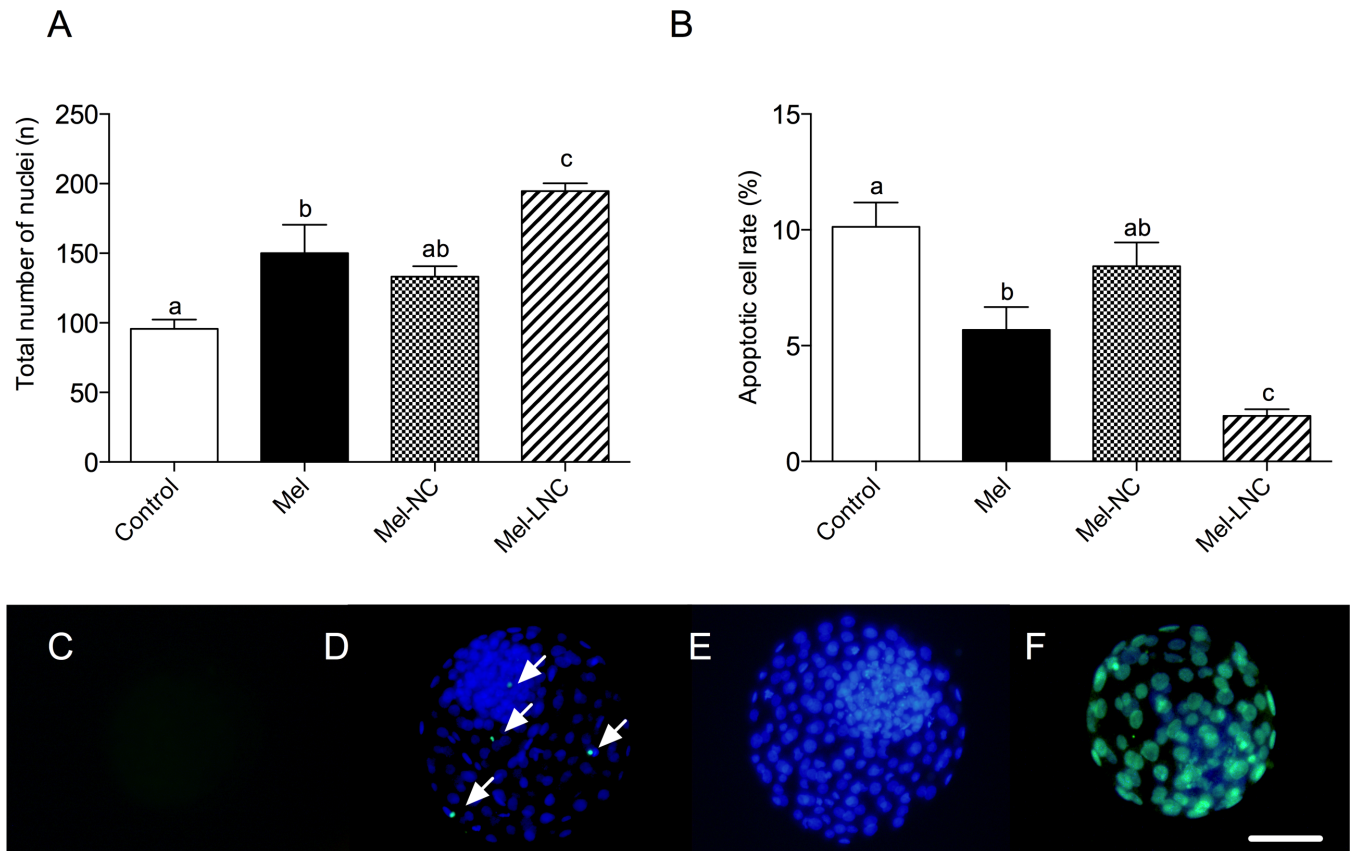

**Fig 2. Effects of free and nanoencapsulated melatonin ( $10^{-9}$  M) on total cell number and cell apoptosis in blastocysts.** Effect of treatment on total cell number (A), and apoptotic cell rate in blastocysts (B). Data represent mean  $\pm$  S.E.M. Different letters above the error bars indicate significant differences between groups ( $P < 0.05$ ). Representative images of negative control (C), apoptotic cells indicated by arrows (D), total cell number (E), and positive control embryo with both nuclear and TUNEL staining (F). Scale bar = 50  $\mu$ m. Magnification = 100X.

doi:10.1371/journal.pone.0157561.g002

from the Mel-LNC group had the lowest *BAX* mRNA levels among all treatments (Fig 4A,  $P < 0.05$ ). Transcript levels for the apoptosis-related cysteine peptidase 3 (*CASP3*) gene, were lower in blastocysts from Mel, Mel-NC and Mel-LNC groups compared to the control group (Fig 4B,  $P < 0.05$ ). The abundance of mRNA for the SHC-transforming protein 1 (*SHC1*) gene was reduced only in embryos from the Mel-LNC group (Fig 4C,  $P < 0.05$ ). The transcript levels for the myeloid cell leukemia sequence 1 (*MCL1*) gene were not significantly different among treatments (Fig 4D,  $P > 0.05$ ).

Transcript levels for the oxidative stress-related catalase (*CAT*) gene were higher in blastocysts from the Mel and Mel-LNC groups ( $P < 0.05$ ) in comparison to control and Mel-NC groups (Fig 5A). Messenger RNA abundance for the glutathione peroxidase (*GPX*) and peroxide redoxin (*PRDX5*) genes were similar in embryos from all the treatments (Fig 5B and 5C,  $P > 0.05$ ). Transcript levels for the superoxide dismutase 2 (*SOD2*) gene were higher in blastocysts from the Mel-LNC group compared to control, Mel and Mel-NC groups ( $P < 0.05$ , Fig 5D).

The relative abundance of mRNA for the pluripotency-related genes POU class 5 homeobox 1 (*OCT4*), SRY (sex determining region Y)-box 2 (*SOX2*) and nanog homeobox (*NANOG*) genes was not different among embryos derived from the different treatments (Fig 6A, 6B and 6C,  $P > 0.05$ ).

### Discussion

Embryos derived from *in vitro* culture systems are exposed to a variety of potentially harmful factors as a result of suboptimal culture conditions that promote lower development rates in relation to *in vivo*-derived ones [49]. For this reason, the search for new components and a better use of elements in the available formulations of embryonic culture media are envisioned as a primary research area in embryology.

One important improvement in the culture medium is melatonin supplementation for embryo *in vitro* production. It has been shown to accelerate and enhance nuclear maturation

A

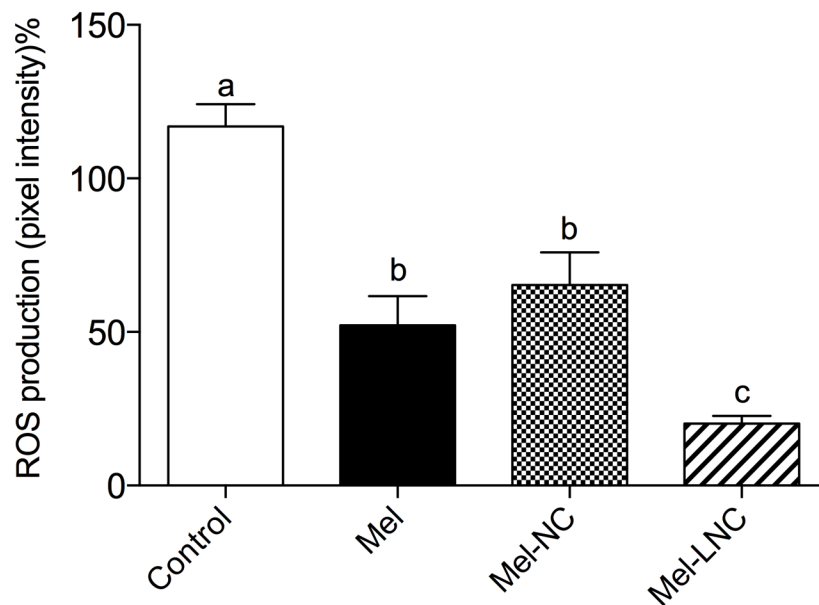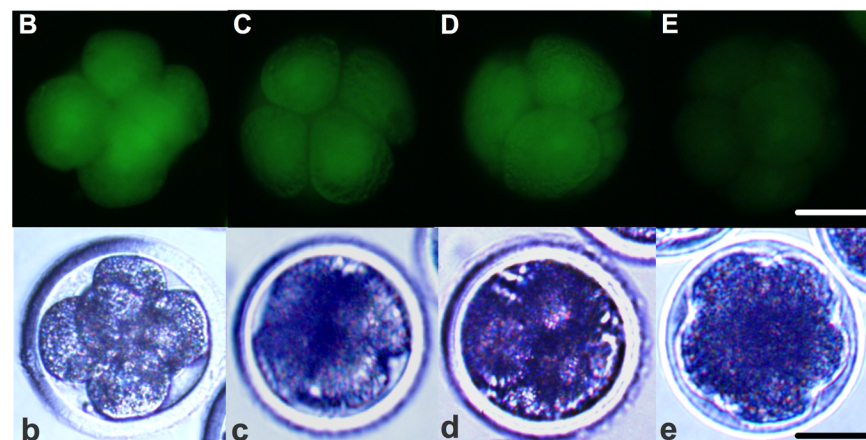

**Fig 3. ROS levels in 4–8 cell stage embryos cultured in the presence of free and nanoencapsulated melatonin.** Embryos were cultured in the presence of  $10^{-9}$  M melatonin non-encapsulated (Mel) or encapsulated in nanocapsules (Mel-NC) or lipid-core nanocapsules (Mel-LNC). In the control group embryos were cultured in SOFaa BSA medium alone. Data represent mean  $\pm$  S.E.M. Different letters above the error bars indicate significant differences between groups ( $P < 0.05$ ). Representative fluorescent (B, C, D, E) and corresponding bright field (b, c, d, e) images of control, Mel, Mel-NC, and Mel-LNC embryos, respectively. Scale bar = 50  $\mu$ m. Magnification = 100X.

doi:10.1371/journal.pone.0157561.g003

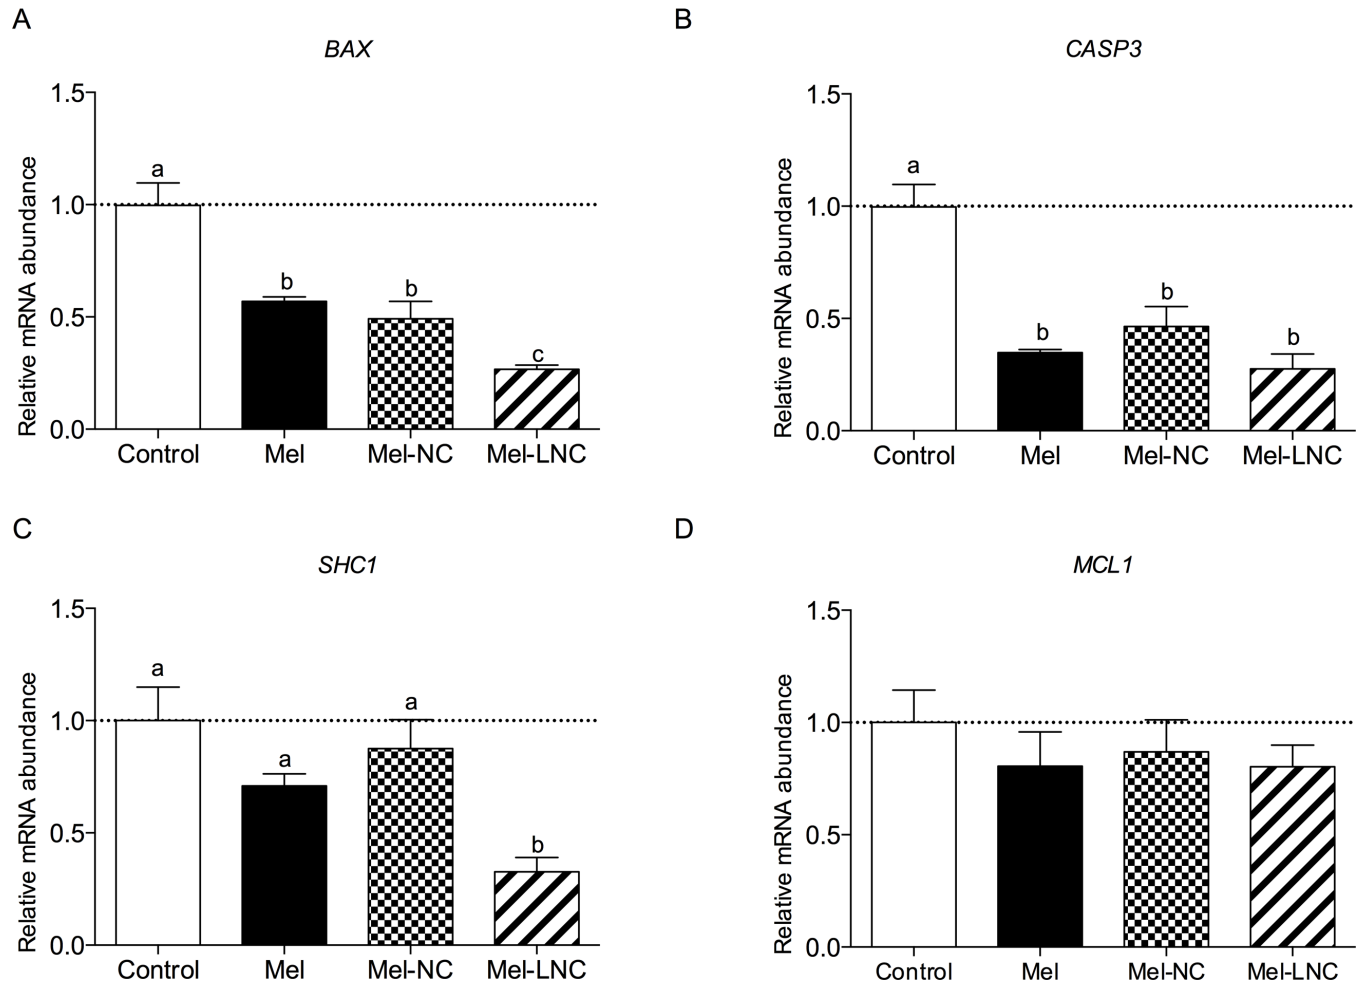

**Fig 4. Effects of free and nanoencapsulated melatonin ( $10^{-9}$  M) on the relative mRNA abundance of apoptosis-related genes.** Transcript levels of four apoptosis-related genes BAX (A), CASP3 (B), SHC1 (C) and MCL1 (D) were quantified by q-PCR. Data represent mean  $\pm$  S.E.M. Different letters (a, b and c) indicate significant differences between groups ( $P < 0.05$ ).

doi:10.1371/journal.pone.0157561.g004

rates [50], increase cumulus cells expansion, improve mitochondria distribution [51], decrease ROS levels [11, 51, 52], and improve developmental competence generating higher quality blastocysts by increasing the cell numbers per blastocyst [2, 10, 12, 47, 53] and increasing the hatching blastocyst rates [10].

However, melatonin has some limitations in relation to its chemical properties, such as low solubility in water, low bioavailability, and short biological half-life. To overcome these problems, sustained release dosage forms to deliver melatonin *in vivo* have been investigated since these formulations were reported to be clinically more useful when compared to immediate release formulations [24, 25]. In addition, the administration of melatonin in nanoparticulated systems *in vitro* have been demonstrating advantages in relation to non-encapsulated melatonin as with other molecules with similar shortcomings [25, 54–56].

The highest cell number and hatching rate were found in embryos derived from Mel-LNC group, suggesting that nanoencapsulation of melatonin may contribute to its bioavailability and intracellular delivery. The drug association with the carriers was similar, with 0.49 mg/mL melatonin content in Mel-NC and 0.41 mg/mL in Mel-LNC. We believe that 41 mg/mL in Mel-LNC can be more effective due to its mechanical properties, surface and core chemistry.

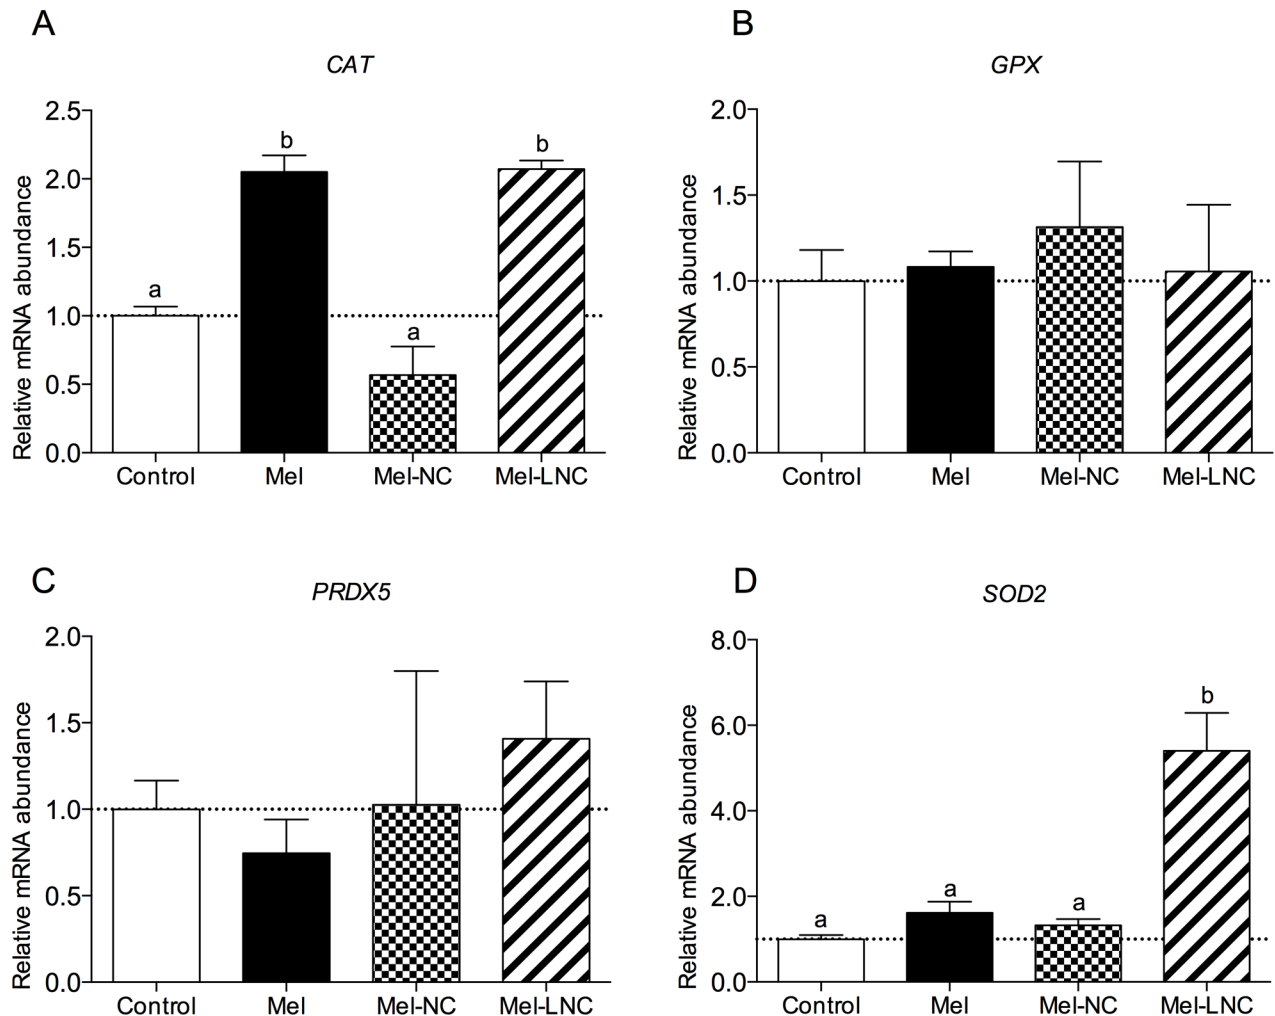

**Fig 5. Effects of free and nanoencapsulated melatonin ( $10^{-9}$  M) on the relative mRNA abundance of oxidative stress-related genes.** Data represent mean  $\pm$  S.E.M. Different letters (a, b and c) indicate significant differences between groups ( $P < 0.05$ ).

doi:10.1371/journal.pone.0157561.g005

In relation to the core, we demonstrated previously that the organogel formed the core of the LNC is a second diffusional barrier for the drug release [57]. In addition, the LNC have a more rigid core and polymer wall compared to polymeric nanocapsules prepared without sorbitan monostearate (the solid component of the core) [35].

Another factor is the variation in size distribution and mean particle diameter, due its impact on the surface area [38]. Generally, nanoparticles prepared by different methods have average diameters between 100 and 300 nm [29]. LNCs are stiffer and smaller than NCs [35]. The size of Mel-NC and Mel-LNC had average diameter  $D_{4,3}$  of 237 nm and 171 nm, respectively. Despite this slight difference, the smaller size of the Mel-LNC may have made it easier for passage through the biological barriers, providing better integration and delivery of melatonin to the embryonic subcellular compartments, such as mitochondria and nuclei. In addition, it is known that smaller particles with higher flexibility give deeper penetration in skin [35]. However, in oocytes and embryos, it is still unclear how nanomaterials can cross zona pellucida and plasmatic membrane, and if this occurs spontaneously or through specific channels [58–60].

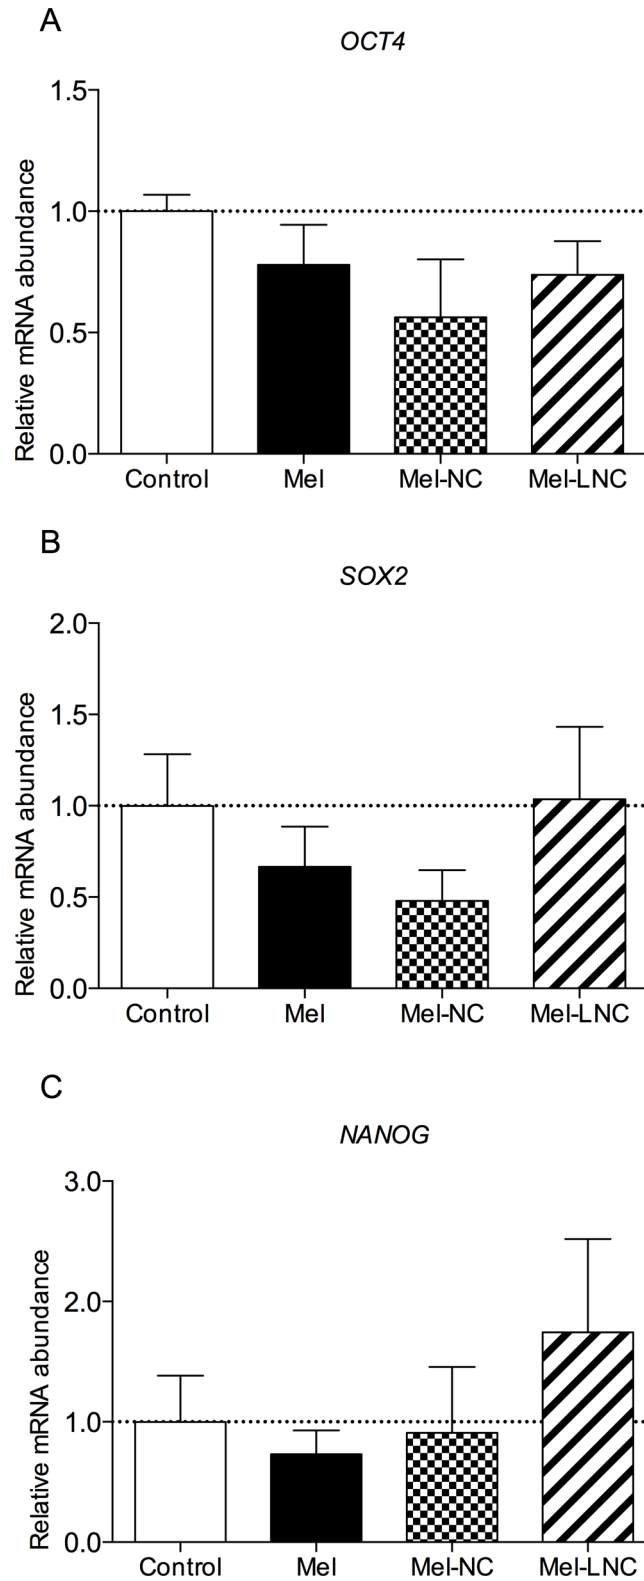

**Fig 6. Effects of free and nanoencapsulated melatonin ( $10^{-9}$  M) on the relative mRNA abundance of pluripotency-related genes in bovine blastocysts.** Data represent mean  $\pm$  S.E.M.

doi:10.1371/journal.pone.0157561.g006

In our study, we also observed that blastocysts treated with Mel-LNC exhibited apoptosis frequency significantly lower than all other groups. In addition, the relative abundance of mRNA for apoptosis showed that pro-apoptotic *BAX*, *CASP3*, and *SHC1* genes were down-regulated by Mel-LNC treatment. Apoptosis can be induced by oxidative stress caused by ROS accumulation during *in vitro* culture of embryos resulting in lower blastocyst rate, low quality, and increased number of apoptotic nuclei [2]. Wang and co-workers [10] reported that melatonin treatment up-regulates relative abundance of mRNA for anti-apoptotic factor *BCL2* while down-regulating abundance of mRNA for pro-apoptotic genes, *p53* and *CASP3*.

We showed that Mel and Mel-LNC were able to significantly reduce the ROS levels in 4–8 cell-stage embryos. However, embryos treated with Mel-LNC showed the lowest production of ROS. Although we did find that Mel-LNC reduce ROS levels, the abundance of mRNA for the *CAT* and *SOD2* genes were altered in different ways. The *CAT* transcript levels were up-regulated in blastocysts treated with Mel or Mel-LNC in comparison with the control and Mel-NC groups while *SOD2* transcript levels were up-regulated only in Mel-LNC group. These results may suggest that the ability of these embryos to respond to  $O_2^-$  is impaired or, the steady-state level of  $O_2^-$  is lower in the groups with low *SOD2* activity, even if the total oxidant concentration is elevated. In our study, *GPX* was not altered by treatment with both, Mel and Mel-LNC, even when transcript levels were up-regulated for the *SOD2* gene. Previous studies reported that melatonin up-regulates the expression of *SOD2* without affecting *GPX* [10].

Our result demonstrates that both Mel-NC as Mel-LNC did not induce aberrant expression of pluripotency genes, *OCT4*, *SOX2*, and *NANOG*, thus maintaining the pluripotency potential in bovine embryonic cells. These genes are associated with the maintenance of a ‘non-differentiating trophoblast’ and their aberrant expression during early embryonic development, gestation, and parturition frequently leads to embryonic loss and the so-called abnormal offspring syndrome (AOS) [61].

Based on our results, Mel-LNC were more efficient than Mel-NC to improve the anti-apoptotic and antioxidant effects of melatonin during bovine embryo development. These findings suggest that the shape, architecture, surface chemical composition and component of the core could influence drug release and distribution in the culture medium in different ways. The melatonin-encapsulation efficiency was mainly influenced by the polymer nature. We showed in a previous study that melatonin formulations prepared with polymethacrylate (Eudragit® S100) presented encapsulation efficiencies 56% while using polyester [poly( $\epsilon$ -caprolactone)] were around 39% and attributed this to the difference of melatonin affinity for these two polymeric materials [20, 39, 62]. Theoretically, in nanocapsules, drugs should be encapsulated by the polymer membrane and dissolved in the oil core, but it is known that some drugs are not completely water insoluble, which causes the drug to be dissolved in both the core and the aqueous suspension. The drug release mechanisms can be driven by the diffusion of the drug from the particles, the erosion/degradation of the particles, or both [38, 63].

Previously, we published studies using nanomaterials applied to sperm mediated gene transfer [27, 64]. Now, this is the first report using nanoencapsulated melatonin in embryo culture and the results obtained in this study might provide a promising strategy to supplement melatonin and other antioxidants, hormones and molecules poorly soluble in water, in culture media used for *in vitro* embryo production. Ongoing studies are being conducted by our research group to evaluate if Mel-LNC supplementation during oocyte *in vitro* maturation also provides advantages in relation to non-encapsulated melatonin.

The internalization mechanisms of NPs are only partially understood [60], furthermore it is important to clarify how the internalization of nanomaterials in gametes and embryos occurs, what happens to this material after fertilization and during embryo development, and what are

the consequences of nanomaterial accumulation on fertility, embryo development and health of the offspring.

## Conclusions

In conclusion, we have shown that Mel-LNC is more efficient than Mel-NC, Mel, and the control groups to improve anti-apoptotic and antioxidant effects of melatonin during bovine embryo development. This work serve as a base for further studies that can increase the efficiency and durability of embryonic culture media, through supplementation and formulation of culture media with components carried in nanomaterials. In the future *in vivo* studies are planned.

## Supporting Information

**S1 Table. Primers sequences used for real-time PCR.**

(DOCX)

**S2 Table. *In vitro* development rates of bovine embryos cultured in SOFaa BSA media supplemented with free melatonin or nanocapsules loaded with melatonin.** Proportion of bovine zygotes that cleaved and developed to 4, 8, 16-cell embryos, morulas and blastocysts.

(DOCX)

**S3 Table. Effect of non-encapsulated melatonin (Mel), melatonin-loaded in polymeric (Mel-NC) and lipid-core (Mel-LNC) nanocapsules on hatching blastocyst rate at Day 9.**

(DOCX)

**S4 Table. Effect of non-encapsulated melatonin (Mel), melatonin-loaded in polymeric (Mel-NC) and lipid-core (Mel-LNC) nanocapsules on cell number and apoptotic cell rate per blastocyst at D7.**

(DOCX)

## Author Contributions

Conceived and designed the experiments: TC FKS SSG ARP RCRB. Performed the experiments: ERK MHR CGL WBD DSJ. Analyzed the data: TC VFC FKS JCD. Contributed reagents/materials/analysis tools: TC ACB SSG VB. Wrote the paper: TC ERK MHR FKS SSG ARP VB.

## References

1. Guerin P, El Mouatassim S, Menezo Y. Oxidative stress and protection against reactive oxygen species in the pre-implantation embryo and its surroundings. *Human reproduction update*. 2001; 7(2):175–89. PMID: [11284661](#).
2. Choi J, Park SM, Lee E, Kim JH, Jeong YI, Lee JY, et al. Anti-apoptotic effect of melatonin on preimplantation development of porcine parthenogenetic embryos. *Molecular reproduction and development*. 2008; 75(7):1127–35. doi: [10.1002/mrd.20861](#) PMID: [18324672](#).
3. Fulda S, Gorman AM, Hori O, Samali A. Cellular stress responses: cell survival and cell death. *Int J Cell Biol*. 2010; 2010:214074. doi: [10.1155/2010/214074](#) PMID: [20182529](#); PubMed Central PMCID: PMC2825543.
4. Papis K, Poleszczuk O, Wenta-Muchalska E, Modlinski JA. Melatonin effect on bovine embryo development *in vitro* in relation to oxygen concentration. *Journal of pineal research*. 2007; 43(4):321–6. Epub 2007/10/04. doi: [10.1111/j.1600-079X.2007.00479.x](#) PMID: [17910599](#).
5. Manjunatha BM, Devaraj M, Gupta PS, Ravindra JP, Nandi S. Effect of taurine and melatonin in the culture medium on buffalo *in vitro* embryo development. *Reprod Domest Anim*. 2009; 44(1):12–6. Epub 2008/05/30. doi: [10.1111/j.1439-0531.2007.00982.x](#) PMID: [18507802](#).

6. Takada L, Junior AM, Mingoti GZ, Balieiro JC, Cipolla-Neto J, Coelho LA. Effect of melatonin on DNA damage of bovine cumulus cells during *in vitro* maturation (IVM) and on *in vitro* embryo development. *Res Vet Sci.* 2012; 92(1):124–7. Epub 2010/12/21. doi: [10.1016/j.rvsc.2010.11.004](https://doi.org/10.1016/j.rvsc.2010.11.004) PMID: [21167539](https://pubmed.ncbi.nlm.nih.gov/21167539/).
7. Asgari Z, Ghasemian F, Ramezani M, Bahadori MH. The effect of melatonin on the developmental potential and implantation rate of mouse embryos. *Cell J.* 2012; 14(3):203–8. Epub 2013/03/20. PMID: [23508820](https://pubmed.ncbi.nlm.nih.gov/23508820/); PubMed Central PMCID: [PMC3584437](https://pubmed.ncbi.nlm.nih.gov/PMC3584437/).
8. Cebrian-Serrano A, Salvador I, Raga E, Dinnyes A, Silvestre MA. Beneficial effect of melatonin on blastocyst *in vitro* production from heat-stressed bovine oocytes. *Reprod Domest Anim.* 2013; 48(5):738–46. Epub 2013/03/06. doi: [10.1111/rda.12154](https://doi.org/10.1111/rda.12154) PMID: [23458773](https://pubmed.ncbi.nlm.nih.gov/23458773/).
9. Lord T, Nixon B, Jones KT, Aitken RJ. Melatonin prevents postovulatory oocyte aging in the mouse and extends the window for optimal fertilization *in vitro*. *Biology of reproduction.* 2013; 88(3):67. Epub 2013/02/01. doi: [10.1095/biolreprod.112.106450](https://doi.org/10.1095/biolreprod.112.106450) PMID: [23365415](https://pubmed.ncbi.nlm.nih.gov/23365415/).
10. Wang F, Tian X, Zhang L, Tan D, Reiter RJ, Liu G. Melatonin promotes the *in vitro* development of pronuclear embryos and increases the efficiency of blastocyst implantation in murine. *Journal of pineal research.* 2013; 55(3):267–74. Epub 2013/06/19. doi: [10.1111/jpi.12069](https://doi.org/10.1111/jpi.12069) PMID: [23772689](https://pubmed.ncbi.nlm.nih.gov/23772689/).
11. Kang JT, Koo OJ, Kwon DK, Park HJ, Jang G, Kang SK, et al. Effects of melatonin on *in vitro* maturation of porcine oocyte and expression of melatonin receptor RNA in cumulus and granulosa cells. *Journal of pineal research.* 2009; 46(1):22–8. Epub 2008/05/23. doi: [10.1111/j.1600-079X.2008.00602.x](https://doi.org/10.1111/j.1600-079X.2008.00602.x) PMID: [18494781](https://pubmed.ncbi.nlm.nih.gov/18494781/).
12. Shi JM, Tian XZ, Zhou GB, Wang L, Gao C, Zhu SE, et al. Melatonin exists in porcine follicular fluid and improves *in vitro* maturation and parthenogenetic development of porcine oocytes. *Journal of pineal research.* 2009; 47(4):318–23. Epub 2009/10/13. doi: [10.1111/j.1600-079X.2009.00717.x](https://doi.org/10.1111/j.1600-079X.2009.00717.x) PMID: [19817971](https://pubmed.ncbi.nlm.nih.gov/19817971/).
13. Gao C, Han HB, Tian XZ, Tan DX, Wang L, Zhou GB, et al. Melatonin promotes embryonic development and reduces reactive oxygen species in vitrified mouse 2-cell embryos. *Journal of pineal research.* 2012; 52(3):305–11. Epub 2012/01/10. doi: [10.1111/j.1600-079X.2011.00944.x](https://doi.org/10.1111/j.1600-079X.2011.00944.x) PMID: [22225541](https://pubmed.ncbi.nlm.nih.gov/22225541/).
14. Wang F, Tian X, Zhou Y, Tan D, Zhu S, Dai Y, et al. Melatonin improves the quality of *in vitro* produced (IVP) bovine embryos: implications for blastocyst development, cryotolerance, and modifications of relevant gene expression. *PLoS One.* 2014; 9(4):e93641. Epub 2014/04/04. doi: [10.1371/journal.pone.0093641](https://doi.org/10.1371/journal.pone.0093641) PMID: [24695534](https://pubmed.ncbi.nlm.nih.gov/24695534/); PubMed Central PMCID: [PMC3973586](https://pubmed.ncbi.nlm.nih.gov/PMC3973586/).
15. Rivara S, Lorenzi S, Mor M, Plazzi PV, Spadoni G, Bedini A, et al. Analysis of structure-activity relationships for MT2 selective antagonists by melatonin MT1 and MT2 receptor models. *Journal of medicinal chemistry.* 2005; 48(12):4049–60. doi: [10.1021/jm048956y](https://doi.org/10.1021/jm048956y) PMID: [15943478](https://pubmed.ncbi.nlm.nih.gov/15943478/).
16. Takahashi M. Oxidative stress and redox regulation on *in vitro* development of mammalian embryos. *J Reprod Dev.* 2012; 58(1):1–9. Epub 2012/03/28. PMID: [22450278](https://pubmed.ncbi.nlm.nih.gov/22450278/).
17. Cruz MH, Leal CL, da Cruz JF, Tan DX, Reiter RJ. Role of melatonin on production and preservation of gametes and embryos: a brief review. *Anim Reprod Sci.* 2014; 145(3–4):150–60. Epub 2014/02/25. doi: [10.1016/j.anireprosci.2014.01.011](https://doi.org/10.1016/j.anireprosci.2014.01.011) PMID: [24559971](https://pubmed.ncbi.nlm.nih.gov/24559971/).
18. Fischer TW, Kleszczynski K, Hardkop LH, Kruse N, Zillikens D. Melatonin enhances antioxidative enzyme gene expression (CAT, GPx, SOD), prevents their UVR-induced depletion, and protects against the formation of DNA damage (8-hydroxy-2'-deoxyguanosine) in ex vivo human skin. *Journal of pineal research.* 2013; 54(3):303–12. Epub 2012/11/01. doi: [10.1111/jpi.12018](https://doi.org/10.1111/jpi.12018) PMID: [23110400](https://pubmed.ncbi.nlm.nih.gov/23110400/).
19. Proietti S, Carlomagno G, Dinicola S, Bizzarri M. Soft gel capsules improve melatonin's bioavailability in humans. *Expert Opin Drug Metab Toxicol.* 2014; 10(9):1193–8. Epub 2014/07/22. doi: [10.1517/17425255.2014.943183](https://doi.org/10.1517/17425255.2014.943183) PMID: [25046730](https://pubmed.ncbi.nlm.nih.gov/25046730/).
20. Hoffmeister CR, Durlin TL, Schaffazick SR, Raffin RP, Bender EA, Beck RC, et al. Hydrogels containing redispersible spray-dried melatonin-loaded nanocapsules: a formulation for transdermal-controlled delivery. *Nanoscale Res Lett.* 2012; 7(1):251. Epub 2012/05/17. doi: [10.1186/1556-276X-7-251](https://doi.org/10.1186/1556-276X-7-251) PMID: [22587614](https://pubmed.ncbi.nlm.nih.gov/22587614/); PubMed Central PMCID: [PMC3463463](https://pubmed.ncbi.nlm.nih.gov/PMC3463463/).
21. Pohlmann AR, Schaffazick SR, Creczynski-Pasa TB, Guterres SS. Preparation of drug-loaded polymeric nanoparticles and evaluation of the antioxidant activity against lipid peroxidation. *Methods Mol Biol.* 2010; 610:109–21. doi: [10.1007/978-1-60327-029-8\\_7](https://doi.org/10.1007/978-1-60327-029-8_7) PMID: [20013175](https://pubmed.ncbi.nlm.nih.gov/20013175/).
22. Schaffazick SR, Pohlmann AR, de Cordova CA, Creczynski-Pasa TB, Guterres SS. Protective properties of melatonin-loaded nanoparticles against lipid peroxidation. *International journal of pharmaceuticals.* 2005; 289(1–2):209–13. Epub 2005/01/18. doi: [10.1016/j.ijpharm.2004.11.003](https://doi.org/10.1016/j.ijpharm.2004.11.003) PMID: [15652213](https://pubmed.ncbi.nlm.nih.gov/15652213/).
23. Schaffazick SR, Pohlmann AR, Guterres SS. Nanocapsules, nanoemulsion and nanodispersion containing melatonin: preparation, characterization and stability evaluation. *Pharmazie.* 2007; 62(5):354–60. Epub 2007/06/15. PMID: [17557743](https://pubmed.ncbi.nlm.nih.gov/17557743/).



24. Kumar A, Mehrotra S, Singh G, Narayanan K, Das GK, Soni YK, et al. Sustained delivery of exogenous melatonin influences biomarkers of oxidative stress and total antioxidant capacity in summer-stressed anestrous water buffalo (*Bubalus bubalis*). *Theriogenology*. 2015; 83(9):1402–7. doi: [10.1016/j.theriogenology.2014.12.023](https://doi.org/10.1016/j.theriogenology.2014.12.023) PMID: [25805692](https://pubmed.ncbi.nlm.nih.gov/25805692/).
25. El-Gibaly I, Meki AM, Abdel-Ghaffar SK. Novel B melatonin-loaded chitosan microcapsules: *in vitro* characterization and antiapoptosis efficacy for aflatoxin B1-induced apoptosis in rat liver. *International journal of pharmaceutics*. 2003; 260(1):5–22. PMID: [12818806](https://pubmed.ncbi.nlm.nih.gov/12818806/).
26. Barkalina N, Jones C, Wood MJ, Coward K. Extracellular vesicle-mediated delivery of molecular compounds into gametes and embryos: learning from nature. *Human reproduction update*. 2015; 21(5):627–39. doi: [10.1093/humupd/dmv027](https://doi.org/10.1093/humupd/dmv027) PMID: [26071427](https://pubmed.ncbi.nlm.nih.gov/26071427/).
27. Campos VF, Komninou ER, Urtiaga G, de Leon PM, Seixas FK, Dellagostin OA, et al. NanoSMGT: transfection of exogenous DNA on sex-sorted bovine sperm using nanopolymer. *Theriogenology*. 2011; 75(8):1476–81. Epub 2011/03/12. doi: [10.1016/j.theriogenology.2011.01.009](https://doi.org/10.1016/j.theriogenology.2011.01.009) PMID: [21392821](https://pubmed.ncbi.nlm.nih.gov/21392821/).
28. Pardeike J, Hommoss A, Muller RH. Lipid nanoparticles (SLN, NLC) in cosmetic and pharmaceutical dermal products. *International journal of pharmaceutics*. 2009; 366(1–2):170–84. Epub 2008/11/11. doi: [10.1016/j.ijpharm.2008.10.003](https://doi.org/10.1016/j.ijpharm.2008.10.003) PMID: [18992314](https://pubmed.ncbi.nlm.nih.gov/18992314/).
29. Ourique AF, Azoubel S, Ferreira CV, Silva CB, Marchiori MC, Pohlmann AR, et al. Lipid-core nanocapsules as a nanomedicine for parenteral administration of tretinoin: development and *in vitro* antitumor activity on human myeloid leukaemia cells. *Journal of biomedical nanotechnology*. 2010; 6(3):214–23. PMID: [21179938](https://pubmed.ncbi.nlm.nih.gov/21179938/).
30. Mora-Huertas CE, Fessi H, Elaissari A. Polymer-based nanocapsules for drug delivery. *International journal of pharmaceutics*. 2010; 385(1–2):113–42. doi: [10.1016/j.ijpharm.2009.10.018](https://doi.org/10.1016/j.ijpharm.2009.10.018) PMID: [19825408](https://pubmed.ncbi.nlm.nih.gov/19825408/).
31. Schultze E, Ourique A, Yurgel VC, Begnini KR, Thurow H, de Leon PM, et al. Encapsulation in lipid-core nanocapsules overcomes lung cancer cell resistance to tretinoin. *Eur J Pharm Biopharm*. 2014; 87(1):55–63. Epub 2014/02/15. doi: [10.1016/j.ejpb.2014.02.003](https://doi.org/10.1016/j.ejpb.2014.02.003) PMID: [24525073](https://pubmed.ncbi.nlm.nih.gov/24525073/).
32. Oliveira CP, Venturini CG, Donida B, Poletto FS, Guterres IS, Pohlmann AR. An algorithm to determine the mechanism of drug distribution in lipid-core nanocapsule formulations. *Soft Matter*. 2013; 9(4):1141–50. PMID: [WOS:000312553900016](https://pubmed.ncbi.nlm.nih.gov/WOS:000312553900016/).
33. Zhao M, Biswas A, Hu B, Joo KI, Wang P, Gu Z, et al. Redox-responsive nanocapsules for intracellular protein delivery. *Biomaterials*. 2011; 32(22):5223–30. Epub 2011/04/26. doi: [10.1016/j.biomaterials.2011.03.060](https://doi.org/10.1016/j.biomaterials.2011.03.060) PMID: [21514660](https://pubmed.ncbi.nlm.nih.gov/21514660/).
34. Pinto Reis C, Neufeld RJ, Ribeiro AJ, Veiga F. Nanoencapsulation I. Methods for preparation of drug-loaded polymeric nanoparticles. *Nanomedicine*. 2006; 2(1):8–21. Epub 2007/02/13. doi: [10.1016/j.nano.2005.12.003](https://doi.org/10.1016/j.nano.2005.12.003) PMID: [17292111](https://pubmed.ncbi.nlm.nih.gov/17292111/).
35. Fiel LA, Rebelo LM, Santiago TD, Adorne MD, Guterres SS, de Sousa JS, et al. Diverse deformation properties of polymeric nanocapsules and lipid-core nanocapsules. *Soft Matter*. 2011; 7(16):7240–7. PMID: [WOS:000293412900016](https://pubmed.ncbi.nlm.nih.gov/WOS:000293412900016/).
36. Poletto FS, de Oliveira CP, Wender H, Regent D, Donida B, Teixeira SR, et al. How Sorbitan Monostearate Can Increase Drug-Loading Capacity of Lipid-Core Polymeric Nanocapsules. *Journal of Nanoscience and Nanotechnology*. 2015; 15(1):827–37. PMID: [WOS:000345054000148](https://pubmed.ncbi.nlm.nih.gov/WOS:000345054000148/).
37. Venturini CG, Jager E, Oliveira CP, Bernardi A, Battastini AMO, Guterres SS, et al. Formulation of lipid core nanocapsules. *Colloids and Surfaces a-Physicochemical and Engineering Aspects*. 2011; 375(1–3):200–8. PMID: [WOS:000287285500028](https://pubmed.ncbi.nlm.nih.gov/WOS:000287285500028/).
38. Pohlmann AR, Fonseca FN, Paese K, Detoni CB, Coradini K, Beck RC, et al. Poly(-caprolactone) microcapsules and nanocapsules in drug delivery. *Expert Opin Drug Deliv*. 2013; 10(5):623–38. Epub 2013/02/08. doi: [10.1517/17425247.2013.769956](https://doi.org/10.1517/17425247.2013.769956) PMID: [23387432](https://pubmed.ncbi.nlm.nih.gov/23387432/).
39. Jornada DS, Fiel LA, Bueno K, Gerent JF, Petzhold CL, Beck RCR, et al. Lipid-core nanocapsules: mechanism of self-assembly, control of size and loading capacity. *Soft Matter*. 2012; 8(24):6646–55. PMID: [WOS:000304665400028](https://pubmed.ncbi.nlm.nih.gov/WOS:000304665400028/).
40. Lucas CG, Remiao MH, Komninou ER, Domingues WB, Haas C, Leon PM, et al. Tretinoin-loaded lipid-core nanocapsules decrease reactive oxygen species levels and improve bovine embryonic development during *in vitro* oocyte maturation. *Reprod Toxicol*. 2015; 58:131–9. doi: [10.1016/j.reprotox.2015.10.004](https://doi.org/10.1016/j.reprotox.2015.10.004) PMID: [26476360](https://pubmed.ncbi.nlm.nih.gov/26476360/).
41. Duarte AA, Gomes PJ, Ribeiro JH, Ribeiro PA, Hoffmann SV, Mason NJ, et al. Characterization of PAH/DPPG layer-by-layer films by VUV spectroscopy. *Eur Phys J E Soft Matter*. 2013; 36(9):98. Epub 2013/09/07. doi: [10.1140/epje/i2013-13098-7](https://doi.org/10.1140/epje/i2013-13098-7) PMID: [24008406](https://pubmed.ncbi.nlm.nih.gov/24008406/).
42. Pers-Kamczyc E, Warzych E, Peippo J, Lechniak D. Growth hormone exerts no effect on the timing of the first zygotic cleavage in cattle. *Theriogenology*. 2010; 74(4):581–95. Epub 2010/05/25. doi: [10.1016/j.theriogenology.2010.03.011](https://doi.org/10.1016/j.theriogenology.2010.03.011) PMID: [20494420](https://pubmed.ncbi.nlm.nih.gov/20494420/).

43. Karja NW, Kikuchi K, Fahrudin M, Ozawa M, Somfai T, Ohnuma K, et al. Development to the blastocyst stage, the oxidative state, and the quality of early developmental stage of porcine embryos cultured in alteration of glucose concentrations *in vitro* under different oxygen tensions. *Reprod Biol Endocrinol*. 2006; 4:54. Epub 2006/11/08. doi: [10.1186/1477-7827-4-54](https://doi.org/10.1186/1477-7827-4-54) PMID: [17087833](https://pubmed.ncbi.nlm.nih.gov/17087833/); PubMed Central PMCID: PMC1636643.
44. Sakatani M, Kobayashi S, Takahashi M. Effects of heat shock on *in vitro* development and intracellular oxidative state of bovine preimplantation embryos. *Molecular reproduction and development*. 2004; 67(1):77–82. Epub 2003/12/04. doi: [10.1002/mrd.20014](https://doi.org/10.1002/mrd.20014) PMID: [14648877](https://pubmed.ncbi.nlm.nih.gov/14648877/).
45. Amarnath D, Li X, Kato Y, Tsunoda Y. Gene expression in individual bovine somatic cell cloned embryos at the 8-cell and blastocyst stages of preimplantation development. *J Reprod Dev*. 2007; 53(6):1247–63. Epub 2007/10/30. PMID: [17965542](https://pubmed.ncbi.nlm.nih.gov/17965542/).
46. Arias-Alvarez M, Garcia-Garcia RM, Rebollar PG, Gutierrez-Adan A, Lopez-Bejar M, Lorenzo PL. Ovarian response and embryo gene expression patterns after nonsuperovulatory gonadotropin stimulation in primiparous rabbits does. *Theriogenology*. 2013; 79(2):323–30. Epub 2012/11/17. doi: [10.1016/j.theriogenology.2012.09.019](https://doi.org/10.1016/j.theriogenology.2012.09.019) PMID: [23154142](https://pubmed.ncbi.nlm.nih.gov/23154142/).
47. Rodriguez-Osorio N, Kim IJ, Wang H, Kaya A, Memili E. Melatonin increases cleavage rate of porcine preimplantation embryos *in vitro*. *Journal of pineal research*. 2007; 43(3):283–8. doi: [10.1111/j.1600-079X.2007.00475.x](https://doi.org/10.1111/j.1600-079X.2007.00475.x) PMID: [17803526](https://pubmed.ncbi.nlm.nih.gov/17803526/).
48. Ishizuka B, Kuribayashi Y, Murai K, Amemiya A, Itoh MT. The effect of melatonin on *in vitro* fertilization and embryo development in mice. *Journal of pineal research*. 2000; 28(1):48–51. Epub 2000/01/08. PMID: [10626601](https://pubmed.ncbi.nlm.nih.gov/10626601/).
49. Lane M, Gardner DK. Understanding cellular disruptions during early embryo development that perturb viability and fetal development. *Reproduction, fertility, and development*. 2005; 17(3):371–8. PMID: [15745645](https://pubmed.ncbi.nlm.nih.gov/15745645/).
50. Chattoraj A, Seth M, Maitra SK. Influence of serotonin on the action of melatonin in MIH-induced meiotic resumption in the oocytes of carp *Catla catla*. *Comparative biochemistry and physiology Part A, Molecular & integrative physiology*. 2008; 150(3):301–6. doi: [10.1016/j.cbpa.2008.03.014](https://doi.org/10.1016/j.cbpa.2008.03.014) PMID: [18455941](https://pubmed.ncbi.nlm.nih.gov/18455941/).
51. El-Raey M, Geshi M, Somfai T, Kaneda M, Hirako M, Abdel-Ghaffar AE, et al. Evidence of melatonin synthesis in the cumulus oocyte complexes and its role in enhancing oocyte maturation *in vitro* in cattle. *Molecular reproduction and development*. 2011; 78(4):250–62. doi: [10.1002/mrd.21295](https://doi.org/10.1002/mrd.21295) PMID: [21381146](https://pubmed.ncbi.nlm.nih.gov/21381146/).
52. Zhao T, Zhu Y, Morinibu A, Kobayashi M, Shinomiya K, Itasaka S, et al. HIF-1-mediated metabolic reprogramming reduces ROS levels and facilitates the metastatic colonization of cancers in lungs. *Scientific reports*. 2014; 4:3793. doi: [10.1038/srep03793](https://doi.org/10.1038/srep03793) PMID: [24452734](https://pubmed.ncbi.nlm.nih.gov/24452734/); PubMed Central PMCID: PMC3899644.
53. Tian X, Wang F, He C, Zhang L, Tan D, Reiter RJ, et al. Beneficial effects of melatonin on bovine oocytes maturation: a mechanistic approach. *Journal of pineal research*. 2014; 57(3):239–47. doi: [10.1111/jpi.12163](https://doi.org/10.1111/jpi.12163) PMID: [25070516](https://pubmed.ncbi.nlm.nih.gov/25070516/).
54. Gou M, Wei X, Men K, Wang B, Luo F, Zhao X, et al. PCL/PEG copolymeric nanoparticles: potential nanoplatforams for anticancer agent delivery. *Current drug targets*. 2011; 12(8):1131–50. PMID: [21443476](https://pubmed.ncbi.nlm.nih.gov/21443476/).
55. Feng R, Song Z, Zhai G. Preparation and *in vivo* pharmacokinetics of curcumin-loaded PCL-PEG-PCL triblock copolymeric nanoparticles. *International journal of nanomedicine*. 2012; 7:4089–98. doi: [10.2147/IJN.S33607](https://doi.org/10.2147/IJN.S33607) PMID: [22888245](https://pubmed.ncbi.nlm.nih.gov/22888245/); PubMed Central PMCID: PMC3414087.
56. Zhang L, Zhang J, Ling Y, Chen C, Liang A, Peng Y, et al. Sustained release of melatonin from poly (lactic-co-glycolic acid) (PLGA) microspheres to induce osteogenesis of human mesenchymal stem cells *in vitro*. *Journal of pineal research*. 2013; 54(1):24–32. doi: [10.1111/j.1600-079X.2012.01016.x](https://doi.org/10.1111/j.1600-079X.2012.01016.x) PMID: [22712496](https://pubmed.ncbi.nlm.nih.gov/22712496/).
57. Jager E, Venturini CG, Poletto FS, Colome LM, Pohlmann JP, Bernardi A, et al. Sustained release from lipid-core nanocapsules by varying the core viscosity and the particle surface area. *Journal of biomedical nanotechnology*. 2009; 5(1):130–40. Epub 2010/01/09. PMID: [20055116](https://pubmed.ncbi.nlm.nih.gov/20055116/).
58. Barkalina N, Charalambous C, Jones C, Coward K. Nanotechnology in reproductive medicine: emerging applications of nanomaterials. *Nanomedicine*. 2014; 10(5):921–38. Epub 2014/01/22. doi: [10.1016/j.nano.2014.01.001](https://doi.org/10.1016/j.nano.2014.01.001) PMID: [24444494](https://pubmed.ncbi.nlm.nih.gov/24444494/).
59. Barkalina N, Jones C, Kashir J, Coote S, Huang X, Morrison R, et al. Effects of mesoporous silica nanoparticles upon the function of mammalian sperm *in vitro*. *Nanomedicine*. 2014; 10(4):859–70. Epub 2013/11/10. doi: [10.1016/j.nano.2013.10.011](https://doi.org/10.1016/j.nano.2013.10.011) PMID: [24200525](https://pubmed.ncbi.nlm.nih.gov/24200525/).
60. Fiorentino I, Gualtieri R, Barbato V, Mollo V, Braun S, Angrisani A, et al. Energy independent uptake and release of polystyrene nanoparticles in primary mammalian cell cultures. *Exp Cell Res*. 2015; 330(2):240–7. doi: [10.1016/j.yexcr.2014.09.017](https://doi.org/10.1016/j.yexcr.2014.09.017) PMID: [25246129](https://pubmed.ncbi.nlm.nih.gov/25246129/).

61. Rodriguez-Alvarez L, Cox J, Tovar H, Einspanier R, Castro FO. Changes in the expression of pluripotency-associated genes during preimplantation and peri-implantation stages in bovine cloned and *in vitro* produced embryos. *Zygote*. 2010; 18(3):269–79. Epub 2010/05/01. doi: [10.1017/S0967199409990323](https://doi.org/10.1017/S0967199409990323) PMID: [20429963](https://pubmed.ncbi.nlm.nih.gov/20429963/).
62. Schaffazick SR, Adriana RPA, Graziela MA, Guterres SS. Development of nanocapsule suspensions and nanocapsule spray-dried powders containing melatonin. *Journal of the Brazilian Chemical Society*. 2006; 17(3):562–9. PMID: [WOS:000237738400020](https://pubmed.ncbi.nlm.nih.gov/WOS:000237738400020/).
63. Soppimath KS, Aminabhavi TM, Kulkarni AR, Rudzinski WE. Biodegradable polymeric nanoparticles as drug delivery devices. *J Control Release*. 2001; 70(1–2):1–20. Epub 2001/02/13. PMID: [11166403](https://pubmed.ncbi.nlm.nih.gov/11166403/).
64. Campos VF, de Leon PM, Komninou ER, Dellagostin OA, Deschamps JC, Seixas FK, et al. NanoSMGT: transgene transmission into bovine embryos using halloysite clay nanotubes or nanopolymer to improve transfection efficiency. *Theriogenology*. 2011; 76(8):1552–60. Epub 2011/08/02. doi: [10.1016/j.theriogenology.2011.06.027](https://doi.org/10.1016/j.theriogenology.2011.06.027) PMID: [21803409](https://pubmed.ncbi.nlm.nih.gov/21803409/).
