# Supplementary material for: Effects of Two Types of Melatonin-Loaded Nanocapsules with Distinct Supramolecular Structures: Polymeric (NC) and Lipid-Core Nanocapsules (LNC) on Bovine Embryo Culture Model
Source: PLoS One. 2016 Jun 16;11(6):e0157561. doi: 10.1371/journal.pone.0157561 (PMC4910990; doi:10.1371/journal.pone.0157561)
Supplement: S3 Table — (DOCX) [file pone.0157561.s003.docx]

Table 3S. Effect of non-encapsulated melatonin (Mel), melatonin-loaded in polymeric (Mel-NC) and lipid-core (Mel-LNC) nanocapsules on hatching blastocyst rate at Day 9.

| Treatment | Hatched blastocyst (%) D9 |
| --- | --- |
| Control | 8 (29.6)a |
| MEL 10-6M | 16 (55)b |
| MEL 10-9M | 17 (61)b |
| MEL 10-12M | 18 (60)b |
| MEL-NC 10-6M | 14 (61)b |
| MEL-NC 10-9M | 15 (52)b |
| MEL-NC 10-12M | 14 (52)b |
| NC (10-6M) | 7 (25.9)a |
| MEL-LNC 10-6M | 21 (70)b |
| MEL-LNC 10-9M | 22 (91.7)c |
| MEL-LNC 10-12M | 13 (65)b |
| LNC (10-6M) | 8 (30.8)a |

a-cWithin the column, rates without a common superscript differed significantly (P < 0.05). Mel: non-encapsulated melatonin; Mel-NC: melatonin-loaded polymeric nanocapsules; Mel-LNC: melatonin-loaded lipid-core nanocapsules; LNC: Lipid-core nanocapsules.
